# Supplementary material
Source: Springer Nature journal article supplement (https://www.springermedizin.de/resource/supplementary/12967_2011_829_MOESM3_ESM.pdf/9577136)

**A. 1.**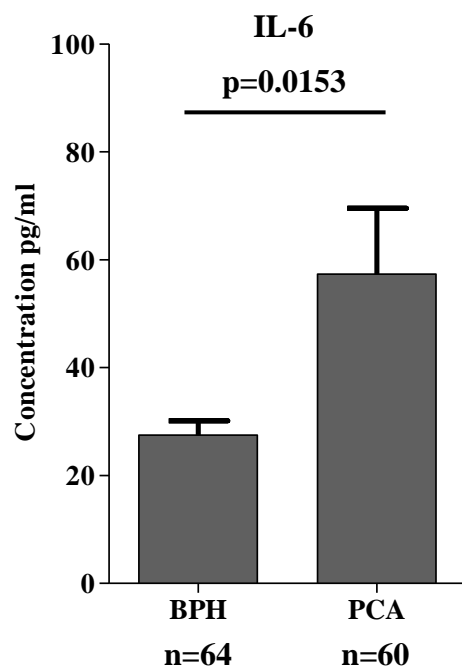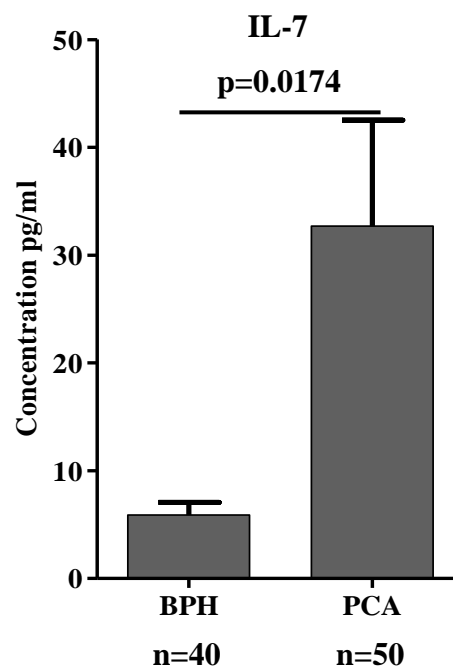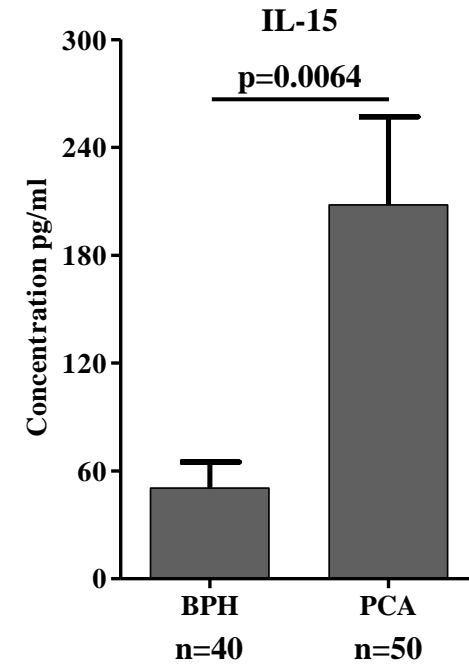**A. 2.**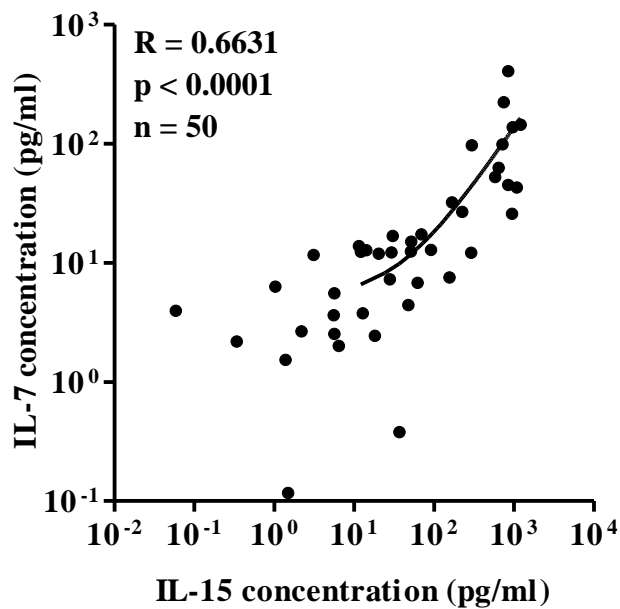**A. 3.**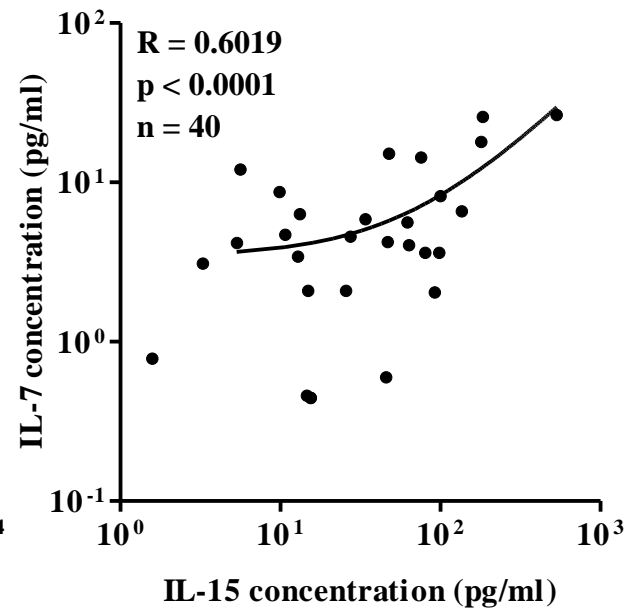**B.**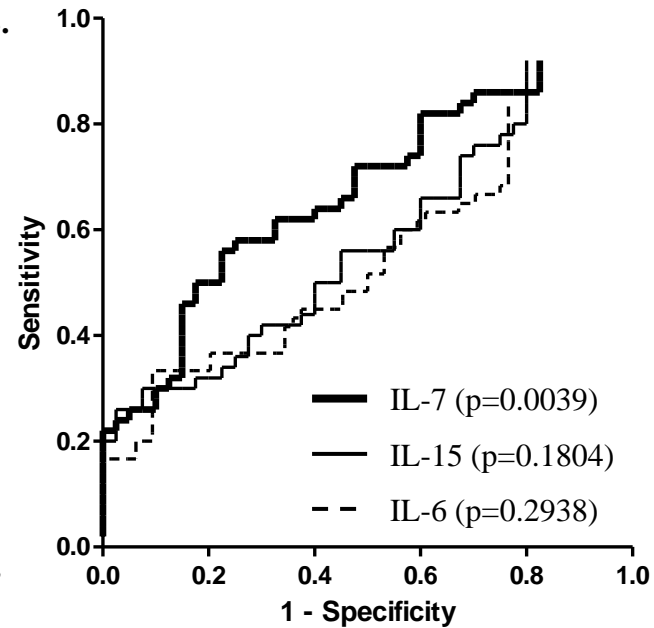

Supplement: MOESM3 [file 9577136]
